# Supplementary material for: Characteristics of young lung cancer: Analysis of Taiwan's nationwide lung cancer registry focusing on epidermal growth factor receptor mutation and smoking status
Source: PubMed Central journal article supplement (PMC5216823; doi:10.18632/oncotarget.9338), 2016-05-13
Supplement: oncotarget-07-46628-s001.pdf [file oncotarget-07-46628-s001.pdf]

## Characteristics of young lung cancer: Analysis of Taiwan's nationwide lung cancer registry focusing on epidermal growth factor receptor mutation and smoking status

### Supplementary Materials

**Supplementary Table S1: Mean age in each genotype group**

|                 | <i>EGFR</i> | <i>ALK</i> | <i>KRAS</i> | <i>HER-2</i> |
|-----------------|-------------|------------|-------------|--------------|
| <b>Positive</b> | 64.1        | 53.4       | 65.6        | 61.0         |
| <b>Negative</b> | 63.3        | 64.3       | 63.7        | 63.8         |
